# Supplementary material
Source: bioRxiv or medRxiv preprint supplement (https://medrxiv.org/highwire/filestream/85647/field_highwire_adjunct_files/4/2020.06.11.20128686-5.pdf)
Supplement: Supplementary file [file 2020.06.11.20128686-5.pdf]

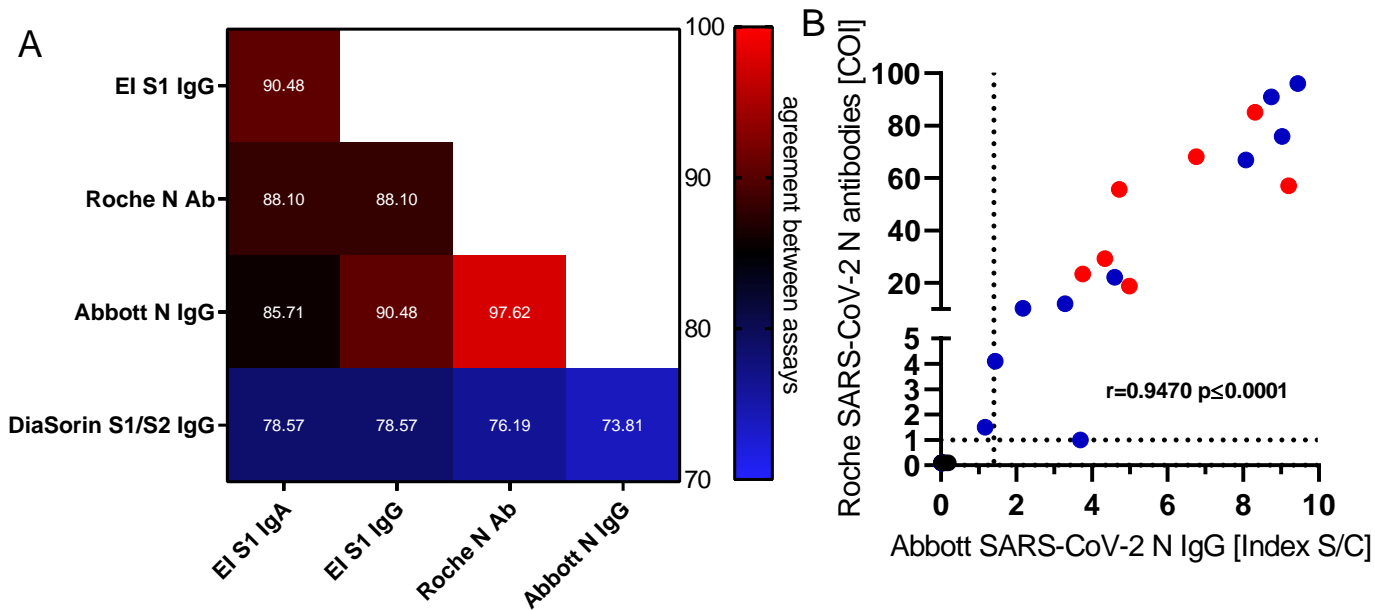

**Figure S2:** Agreement between commercially available Anti-SARS-CoV-2 spike and nucleocapsid assays, Germany Heinsberg District, April 2020 (n=42)

COI: cut-off index; EI: EUROIMMUN; N: nucleocapsid; r: correlation coefficient; SARS-CoV-2: severe acute respiratory syndrome coronavirus 2; S: spike; S/C: sample/control

(A) The comparability between each assay system was calculated and depicted within the heatmap. (B) Correlation between the Roche N Ab test and the Abbott N IgG test, the two N-antibody assays ( $r=0.9470$ ,  $p<0.0001$ ). All results were colour coded according to their status in PCR positive (red), symptomatic (blue) and asymptomatic (black).
